# Supplementary material for: Inner Ear Gene Therapies Take Off: Current Promises and Future Challenges
Source: PubMed Central journal article supplement (PMC7408650; doi:10.3390/jcm9072309), 2020-07-21
Supplement: jcm-09-02309-s001.pdf [file jcm-09-02309-s001.pdf]

**Table S1.** Loci and genes underlying non-syndromic hearing loss that are grouped into several functional categories.

| <b>Non-syndromic hearing loss human genes in the auditory hair cells</b> |                                                                                      |             |
|--------------------------------------------------------------------------|--------------------------------------------------------------------------------------|-------------|
| <b>Hair bundle development and functioning</b>                           |                                                                                      |             |
| <b>Locus</b>                                                             | <b>Gene</b>                                                                          | <b>OMIM</b> |
| DFNB6                                                                    | <i>TMIE</i> (Transmembrane inner ear-expressed gene)                                 | 607237      |
| DFNB7/11, DFNA36                                                         | <i>TMC1</i> (Transmembrane channel-like protein 1)                                   | 606706      |
| DFNB15                                                                   | <i>GIPC3</i> (GIPC PDZ domain-containing family, member 3)                           | 608792      |
| DFNB28                                                                   | <i>TRIOBP</i> (TRIO and F-actin-binding protein)                                     | 609761      |
| DFNB16                                                                   | <i>STRC</i> (stereocilin)                                                            | 606440      |
| DFNB24                                                                   | <i>RDX</i> (radixin)                                                                 | 179410      |
| DFNB25                                                                   | <i>GRXCR1</i> (glutaredoxin and cysteine rich domain containing 1)                   | 613283      |
| DFNB32                                                                   | <i>CDC14A</i> (cell division cycle 14A)                                              | 603504      |
| DFNB36                                                                   | <i>ESPN</i> (espin)                                                                  | 606351      |
| DFNB44                                                                   | <i>ACY1</i> (adenylate cyclase 1)                                                    | 103072      |
| DFNB66                                                                   | <i>DCDC2</i> (doublecortin domain containing 2)                                      | 605755      |
| DFNB63                                                                   | <i>LRTOMT</i> (leucine rich transmembrane and O-methyltransferase domain containing) | 612414      |
| DFNB67                                                                   | <i>LHFPL5</i> (LHFPL tetraspan subfamily member 5)                                   | 609427      |
| DFNB79                                                                   | <i>TPRN</i> (taperin)                                                                | 613354      |
| DFNB82                                                                   | <i>GPSM2</i> (G protein signaling modulator 2)                                       | 609245      |
| DFNB88                                                                   | <i>ELMOD3</i> (ELMO domain containing 3)                                             | 615427      |
| DFNB2/, DFNA11                                                           | <i>MYO7A, USH1B</i> (myosin VIIA)                                                    | 276903      |
| DFNB23                                                                   | <i>USH1F, PCDH15</i> (protocadherin related 15)                                      | 605514      |
| DFNB12                                                                   | <i>USH1D, CDH23</i> (cadherin 23)                                                    | 605516      |
| DFNB18                                                                   | <i>USH1C/USH1C</i> (USH1 protein network component harmonin)                         | 605242      |
| DFNB31                                                                   | <i>USH2D/WRHN</i> (whirlin)                                                          | 607928      |
| DFNB48                                                                   | <i>CIB2</i> (calcium and integrin binding family member 2)                           | 605564      |
| DFNB57                                                                   | <i>PDZD7</i> (PDZ domain containing 7)                                               | 612971      |
| DFNAi                                                                    | <i>MYO1C</i> (myosin IE)                                                             | 601479      |
| DFNB30                                                                   | <i>MYO3A</i> (myosin IIIA)                                                           | 606808      |
| DFNA22                                                                   | <i>MYO6</i> (myosin VI)                                                              | 600970      |
| DFNB3                                                                    | <i>MYO15A</i> (myosin XVA)                                                           | 602666      |
| DFNB99                                                                   | <i>TMEM132E</i> (transmembrane protein 132E)                                         | 616178      |
| DFNB100                                                                  | <i>PIP5K2</i> (diphosphoinositol pentakisphosphate kinase 2)                         | 611648      |
| DFNB101                                                                  | <i>GRXCR2</i> (glutaredoxin and cysteine rich domain containing 2)                   | 615762      |
| DFNB102                                                                  | <i>EPS8</i> (epidermal growth factor receptor pathway substrate 8)                   | 600206      |
| DFNB103                                                                  | <i>CLIC5</i> (chloride intracellular channel 5)                                      | 607293      |
| DFNB103B                                                                 | <i>FAM65B</i> (RHO family interacting cell polarization regulator 2)                 | 611410      |
| DFNB106                                                                  | <i>EPS8L2</i> (EPS8 like 2)                                                          | 614988      |
| DIAPH3                                                                   | <i>AUNA1</i> (diaphanous related formin 3)                                           | 614567      |
| DFNA1                                                                    | <i>DIAPH1</i> (diaphanous related formin 1)                                          | 602121      |
| DFNA20/26                                                                | <i>ACTG1</i> (actin gamma 1)                                                         | 102560      |
| DFNA27                                                                   | <i>REST</i> (RE1 silencing transcription factor)                                     | 600571      |
| DFNA50                                                                   | <i>MIR96</i> (microRNA 96)                                                           | 611606      |
| DFNA67                                                                   | <i>OSBPL2</i> (oxysterol binding protein like 2)                                     | 606731      |
| DFNA76                                                                   | <i>PLS1</i> (plastin 1)                                                              | 602734      |
| DFNB77                                                                   | <i>LOXHD1</i> (lipoxygenase homology domains 1)                                      | 613072      |
| DFNB84A/DFNA73                                                           | <i>PTPRQ</i> (protein tyrosine phosphatase receptor type Q)                          | 603317      |
| <b>Non-syndromic hearing loss human genes in the auditory hair cells</b> |                                                                                      |             |
| <b>Synaptic transmission</b>                                             |                                                                                      |             |
| DFNB9                                                                    | <i>OTOF</i> (otoferlin)                                                              | 603681      |
| DFNB15                                                                   | <i>GIPC3</i> (GIPC PDZ domain containing family member 3)                            | 608792      |
| DFNB18                                                                   | <i>USH1C</i> (USH1 protein network component harmonin)                               | 605242      |
| DFNB86, DFNA65                                                           | <i>TBC1D24</i> (TBC1 domain family member 24)                                        | 613577      |

|                                                                               |                                                                               |        |
|-------------------------------------------------------------------------------|-------------------------------------------------------------------------------|--------|
| DFNB93                                                                        | <i>CABP2</i> (calcium binding protein 2)                                      | 607314 |
| DFNB94                                                                        | <i>NARS2</i> (asparaginyl-tRNA synthetase 2)                                  | 612803 |
| DFNB102                                                                       | <i>EPS8</i> (epidermal growth factor receptor pathway substrate 8)            | 600206 |
| DFNB107                                                                       | <i>WBP2</i> WW domain binding protein 2 ( )                                   | 606962 |
| DFNB108                                                                       | <i>ROR1</i> (receptor tyrosine kinase like orphan receptor 1)                 | 602336 |
| DFNB114                                                                       | <i>GRAP</i> (GRB2 related adaptor protein)                                    | 604330 |
| <i>D FNA25</i>                                                                | <i>SLC17A8</i> (solute carrier family 17 member 8)                            | 607557 |
| DFNA68                                                                        | <i>HOMER2</i> (homer scaffold protein 2)                                      | 604799 |
| DFNA71                                                                        | <i>DMXL2</i> (Dmx like 2)                                                     | 612186 |
| DFNB37 , DFNA22                                                               | <i>MYO6</i> (myosin VI)                                                       | 600970 |
| DIAPH3                                                                        | <i>AUNA1</i> (diaphanous related formin 3)                                    | 614567 |
| <b>Non-syndromic hearing loss human genes in the auditory hair cells</b>      |                                                                               |        |
| <b>Hair cell's adhesion &amp; maintenance</b>                                 |                                                                               |        |
| DFNB29                                                                        | <i>CLDN14</i> (claudin 14)                                                    | 605608 |
| DFNA51                                                                        | <i>TJP2</i> (tight junction protein 2)                                        | 607709 |
| DFNB42                                                                        | <i>ILDR1</i> (immunoglobulin like domain containing receptor 1)               | 609739 |
| DFNA15                                                                        | <i>POU4F3</i> (POU class 4 homeobox 3)                                        | 602460 |
| DFNB61                                                                        | <i>SLC26A5</i> (solute carrier family 26 member 5)                            | 604943 |
| DFNB49                                                                        | <i>MARVELD2</i> MARVEL domain containing 2 ( )                                | 610572 |
| DFNA4A                                                                        | <i>MYH14</i> (myosin heavy chain 14)                                          | 608568 |
| DFNA17                                                                        | <i>MYH9</i> (myosin heavy chain 9)                                            | 160775 |
| DFNB76                                                                        | <i>SYNE4</i> (spectrin repeat containing nuclear envelope family member 4)    | 615535 |
| DFNB91                                                                        | <i>SERPINB6</i> (serpin family B member 6)                                    | 173321 |
| DFNA2A                                                                        | <i>KCNQ4</i> (potassium voltage-gated channel subfamily Q member 4)           | 603537 |
| DFNB109                                                                       | <i>ESRP1</i> (epithelial splicing regulatory protein 1)                       | 612959 |
| DFNB111                                                                       | <i>MPZL2</i> (myelin protein zero like 2)                                     | 604873 |
| DFNA7                                                                         | <i>LMX1A</i> (LIM homeobox transcription factor 1 alpha)                      | 600298 |
| DFNA75                                                                        | <i>TRRAP</i> (transformation/transcription domain associated protein)         | 603015 |
| <b>Non-syndromic hearing loss human genes in diverse inner ear cell types</b> |                                                                               |        |
| <b>Cochlea ion homeostasis</b>                                                |                                                                               |        |
| DFNA3, DFNB1                                                                  | <i>GJB2</i> (gap junction protein beta 2)                                     | 121011 |
| DFNA2B                                                                        | <i>GJB3</i> (gap junction protein beta 3)                                     | 603324 |
| DFNA3B                                                                        | <i>GJB6</i> (gap junction protein beta6)                                      | 604418 |
| DFNA2A                                                                        | <i>KCNQ4</i> (potassium voltage-gated channel subfamily Q member 4)           | 603537 |
| DFNB4                                                                         | <i>PDS,SLC26A4</i> (solute carrier family 26 member 4)                        | 605646 |
| DFNB8/10                                                                      | <i>TMPRSS3</i> (transmembrane serine protease 3)                              | 605511 |
| DFNB60                                                                        | <i>SLC22A4</i> (solute carrier family 22 member 4)                            | 604190 |
| DFNB68                                                                        | <i>S1PR2</i> (sphingosine-1-phosphate receptor 2)                             | 605111 |
| DFNB73                                                                        | <i>BSND</i> (barttin CLCNK type accessory subunit beta)                       | 606412 |
| DFNB103                                                                       | <i>CLIC5</i> (chloride intracellular channel 5)                               | 607293 |
| DFNB115                                                                       | <i>SPNS2</i> (sphingolipid transporter 2)                                     | 612584 |
| DFNA41                                                                        | <i>P2RX2</i> (purinergic receptor P2X 2)                                      | 600844 |
| DFNAi                                                                         | <i>SLC12A2</i> (solute carrier family 12 member 2)                            | 600840 |
| <b>Non-syndromic hearing loss human genes in diverse inner ear cell types</b> |                                                                               |        |
| <b>Transmembrane or secreted proteins<br/>&amp; Extracellular matrix</b>      |                                                                               |        |
| DFNB21, DFNA8                                                                 | <i>12TECTA</i> (tectorin alpha)                                               | 602574 |
| DFNB22                                                                        | <i>OTOA</i> (otoancorin)                                                      | 607038 |
| DFNB18B                                                                       | <i>OTOG</i> (otogelin)                                                        | 604487 |
| DFNB84B                                                                       | <i>OTOGL</i> (otogelin like)                                                  | 614925 |
| DFNA4B,DFNB113                                                                | <i>CEACAM16</i> (CEA cell adhesion molecule 16, tectorial membrane component) | 614591 |
| DFNB26                                                                        | <i>GAB1</i> (GRB2 associated binding protein 1)                               | 604439 |
| DFNB39                                                                        | <i>HGF</i> (hepatocyte growth factor)                                         | 142409 |
| DFNB97                                                                        | <i>MET</i> (MET proto-oncogene, receptor tyrosine kinase)                     | 164860 |

|                                                                               |                                                                 |        |
|-------------------------------------------------------------------------------|-----------------------------------------------------------------|--------|
| DFNA9, DFNB110                                                                | <i>COCH</i> (cochlin)                                           | 603196 |
| DFNA13, DFNB53                                                                | <i>COL11A2</i> (collagen type XI alpha 2 chain)                 | 120290 |
| DFNA37                                                                        | <i>COL11A1</i> (collagen type XI alpha 1 chain)                 | 120280 |
| DFNX6                                                                         | <i>COL4A6</i> (collagen type IV alpha 6 chain)                  | 303631 |
| DFNA44                                                                        | <i>CCDC50</i> (coiled-coil domain containing 50)                | 611051 |
| DFNA56                                                                        | <i>TNC</i> (tenascin C)                                         | 187380 |
| DFNA66                                                                        | <i>CD164</i> (CD164 molecule)                                   | 603356 |
| DFNA69                                                                        | <i>KITLG</i> (KIT ligand)                                       | 184745 |
| <b>Non-syndromic hearing loss human genes in diverse inner ear cell types</b> |                                                                 |        |
| <b>Oxidative stress, metabolism &amp; mitochondria</b>                        |                                                                 |        |
| DFNA5                                                                         | <i>GSDME</i> (gasdermin E)                                      | 608798 |
| DFNA6                                                                         | <i>WFS1</i> (wolframin ER transmembrane glycoprotein)           | 606201 |
| DFNA40                                                                        | <i>CRYM</i> (thiomorpholine-carboxylate dehydrogenase)          | 123740 |
| DFNA64                                                                        | <i>DIABLO</i> (diablo IAP-binding mitochondrial protein)        | 605219 |
| DFNA2C                                                                        | <i>IFNLR1</i> (interferon lambda receptor1)                     | 607404 |
| DFNA74                                                                        | <i>PDE1C</i> (phosphodiesterase 1C)                             | 602987 |
| DFNA70                                                                        | <i>MCM2</i> (minichromosome maintenance complex component2)     | 116945 |
| DFNA34                                                                        | <i>NLRP3</i> (NLR family pyrin domain containing3)              | 606416 |
| DFNX1                                                                         | <i>PRPS1</i> (phosphoribosyl pyrophosphate synthetase 1)        | 311850 |
| DFNB59                                                                        | <i>PJVK</i> (pejvakin)                                          | 610219 |
| DFNB89                                                                        | <i>KARS1</i> (lysyl-tRNA synthetase 1)                          | 601421 |
| DFNB94                                                                        | <i>NARS2</i> (asparaginyl-tRNA synthetase 2,mitochondria)       | 612803 |
| DFNB74                                                                        | <i>MSRB3</i> (methionine sulfoxide reductase B3)                | 613719 |
| DFNB70                                                                        | <i>PNPT1</i> (polyribonucleotide nucleotidyltransferase 1)      | 610316 |
| DFNAi                                                                         | <i>SCD5</i> (stearoyl-CoA desaturase 5)                         | 608370 |
| DFN mitochondrial                                                             | <i>MTRNR1</i> (RIBOSOMAL RNA, MITOCHONDRIAL, 12S; MTRNR1)       | 561000 |
| DFN mitochondrial                                                             | <i>MTTS1</i> (tRNA-Ser TRANSFER RNA, MITOCHONDRIAL)             | 590080 |
| <b>Non-syndromic hearing loss human genes in diverse inner ear cell types</b> |                                                                 |        |
| <b>Transcriptional regulation</b>                                             |                                                                 |        |
| DFNA10                                                                        | <i>EYA4</i> (EYA transcriptional coactivator and phosphatase 4) | 603550 |
| DFNA23                                                                        | <i>SIX1</i> (SIX homeobox 1)                                    | 601205 |
| DFNX2                                                                         | <i>POU3F4</i> (POU class 3 homeobox 4)                          | 300039 |
| DFNB35                                                                        | <i>ESRRB</i> (estrogen related receptor beta)                   | 602167 |
| DFNA28                                                                        | <i>GRHL2</i> (grainyhead like transcription factor 2)           | 608576 |
| DFNB49                                                                        | <i>BDP1</i> (MARVEL domain containing 2)                        | 610572 |

**Table S2.** Comparison of different routes of delivery to the inner ear.

| <b>Direct administration to the inner ear</b>                                                                                                                                                                                                                                                                                                                                                                                                             |                                                                                                                                                                                                                                                                                                                                                                                                                                                  |
|-----------------------------------------------------------------------------------------------------------------------------------------------------------------------------------------------------------------------------------------------------------------------------------------------------------------------------------------------------------------------------------------------------------------------------------------------------------|--------------------------------------------------------------------------------------------------------------------------------------------------------------------------------------------------------------------------------------------------------------------------------------------------------------------------------------------------------------------------------------------------------------------------------------------------|
| <p style="text-align: center;"><b>Posterior semicircular canal (PSCC)</b></p> <p>Pros:</p> <ul style="list-style-type: none"> <li>- wide delivery route through the labyrinth</li> <li>- minimal manipulation of the temporal bone</li> </ul> <p>Cons:</p> <ul style="list-style-type: none"> <li>- no risk of vestibular or auditory damage</li> <li>- low auditory hair cells transduction in the adult ear</li> </ul>                                  | <p style="text-align: center;"><b>Utricle</b></p> <p>Pros:</p> <ul style="list-style-type: none"> <li>- minimal risk of disrupting the cochlea</li> <li>- no hearing or balance damage</li> <li>- easy access to the endolymphatic spaces</li> </ul> <p>Cons:</p> <ul style="list-style-type: none"> <li>- broad viral distribution &amp; high efficient transduction</li> <li>Cons: - not easily accessible for clinical application</li> </ul> |
| <p style="text-align: center;"><b>Round window membrane (RWM)</b></p> <p>Pros:</p> <ul style="list-style-type: none"> <li>- low risk of hearing damage</li> <li>- safe &amp; feasible delivery into perilymphatic space</li> <li>- clinically used for cochlear implantation</li> </ul> <p>Cons:</p> <ul style="list-style-type: none"> <li>- limited viral transduction from base to apex</li> <li>- inability to access endolymphatic spaces</li> </ul> | <p style="text-align: center;"><b>Cochleostomy</b></p> <p>Pros:</p> <ul style="list-style-type: none"> <li>- direct access to the hearing sensory organ</li> </ul> <p>Cons:</p> <ul style="list-style-type: none"> <li>- too invasive</li> <li>- Low volume for injections</li> </ul>                                                                                                                                                            |
| <b>Systemic administration</b>                                                                                                                                                                                                                                                                                                                                                                                                                            | <b>Middle ear administration</b>                                                                                                                                                                                                                                                                                                                                                                                                                 |
| <p>Pros:</p> <ul style="list-style-type: none"> <li>- oral dosage forms</li> <li>- injectable solutions</li> <li>- nanomedicines</li> <li>- no harm to the inner ear</li> </ul> <p>Cons:</p> <ul style="list-style-type: none"> <li>- blood cochlear barrier</li> <li>- low local vascularisation,</li> <li>- diffusion side effects</li> </ul>                                                                                                           | <p>Pros:</p> <ul style="list-style-type: none"> <li>- solutions and suspensions</li> <li>- hydrogels</li> <li>- nanomedicines</li> <li>- medical devices</li> </ul> <p>Cons:</p> <ul style="list-style-type: none"> <li>- limited crossing of round &amp; oval windows</li> <li>- clearance through Eustachian tube</li> </ul>                                                                                                                   |

**Table S3.** Adeno-associated virus (AAV) vectors used in inner ear gene therapy studies.

| AAV vector                                                                   | Transgene      | Animal model                                                    | Route of delivery; age at delivery | Target cells/ outcomes                                                                                                                                                                                                                                                                                                                               | References             |
|------------------------------------------------------------------------------|----------------|-----------------------------------------------------------------|------------------------------------|------------------------------------------------------------------------------------------------------------------------------------------------------------------------------------------------------------------------------------------------------------------------------------------------------------------------------------------------------|------------------------|
| BAAV-CMV- $\beta$ -actin -GFP                                                | $\beta$ -actin | Wild-type and deafened guinea pig                               | Cochleostomy and RMW; adult        | Transduction of supporting cells, but no sensory hair cells.                                                                                                                                                                                                                                                                                         | Shibata et al, 2009    |
| AAV2/1-CMV-eGFP (also AAV2/2, 2/5, 2/6, 2/8)                                 | <i>eGFP</i>    | Wild-type and deafened (kanamycin and furosemide injected) mice | Cochleostomy; 2-12 months          | Efficient AAV inoculation in adult mouse ears, high transduction efficiency of IHCs, especially for serotypes 2 and 8, with hearing preservation.                                                                                                                                                                                                    | Kilpatrick et al, 2011 |
| AAV1-CBA-Kcnq1-eGFP                                                          | <i>Kcnq1</i>   | <i>Kcnq1</i> <sup>-/-</sup> mice                                | Cochleostomy and RWM; P0-P2        | High transduction of marginal cells, normal endocochlear potential and preserved cochlear morphology. Hearing improvement from 20 dB to complete rescue of the deafness phenotype at both low and high frequencies up to 18 weeks after treatment.                                                                                                   | Chang et al, 2015      |
| AAV2/1-CAG-eGFP (also AAV2/2, 5, 6, 6.2, 7, 8, 9, rh.8, rh.10, rh.39, rh.43) | <i>eGFP</i>    | Wild-type mice                                                  | Cochleostomy; 6 weeks              | AAV2/1, 2, 6.2, 7, 8, 9, rh.39, and rh.43 transduce IHCs, but not OHCs, with even partial OHC loss.                                                                                                                                                                                                                                                  | Shu et al, 2016        |
| Anc80L65-CMV-WRPE-eGFP                                                       | <i>eGFP</i>    | Wild-type mice                                                  | RWM; P0-P2                         | Anc80L65 round window membrane injection was well tolerated, as indicated by sensory cell function, hearing and vestibular function, and immunologic parameters. The ability of Anc80L65 to target OHCs at high rates, a requirement for complete restoration of auditory function, enables future gene therapies for hearing and balance disorders. | Landegger et al, 2017  |
| AAV2/Anc80L65-CASI-eGFP-RBG                                                  | <i>eGFP</i>    | Wild-type mice                                                  | PSCC; 7 weeks                      | Cochlea: Successful transduction of all IHCs, a majority of OHCs especially at the apex, and 10% of spiral ganglion neurons. Vestibular end-organs: Robust transduction of macula and crista hair cells, and all supporting cells.                                                                                                                   | Suzuki et al, 2017     |
| AAV2/1-CAG-eGFP (also AAV2/2, 6.2, 8, 9, rh.39, rh.43)                       | <i>eGFP</i>    | Wild-type mice                                                  | PSCC; 8-10 weeks                   | Most AAVs transduced adult IHCs efficiently, but were less efficient at transducing OHCs. Subset of AAVs transduced other cell types. Canalostomy can be a viable delivery route.                                                                                                                                                                    | Tao et al, 2018        |

| AAV2/Anc80L65-CMV-eGFP-WPRE                                              |             |                |                                                 |                                                                                                                                                                                                                                                                                                                                                                                                                                                                                                                                                                                                                                                                           |                       |
|--------------------------------------------------------------------------|-------------|----------------|-------------------------------------------------|---------------------------------------------------------------------------------------------------------------------------------------------------------------------------------------------------------------------------------------------------------------------------------------------------------------------------------------------------------------------------------------------------------------------------------------------------------------------------------------------------------------------------------------------------------------------------------------------------------------------------------------------------------------------------|-----------------------|
| AAV2/9-CMV-eGFP<br>AAV2/Anc80L65-CMV-eGFP                                | <i>eGFP</i> | Wild-type mice | RWM and RWM+ canal fenestration; P15-16, P56-60 | Cochlea: RWM injection with AAV2/9: limited IHC transduction in basal turn with auditory threshold shift.<br>RWM + CF injection with AAV2/9: robust transgene expression without auditory threshold shift. Transduction efficiency in IHCs is independent of injection time point. Cochlear transduction: dose- and AAV serotype-dependent, but not age-dependent.<br>AAV2/Anc80L65 demonstrated superior transduction to AAV2/9. Robust eGFP transduction of all IHCs throughout the cochlea.<br>Vestibular end-organs: Successful transduction with either posterior or lateral semi-circular canal fenestration.<br>AAV2/Anc80L65 transduction was superior to AAV2/9. | Yoshimura et al, 2018 |
| AAV2/2-CBA-eGFP.<br>AAV2/9-CBA-eGFP<br>AAV2/Anc80L65-CMV-<br>globin-eGFP | <i>eGFP</i> | Wild-type mice | Cochleostomy; P2-P3                             | AAV2/2-CBA: Few eGFP-positive sensory hair cells or supporting cells.<br>AAV2/Anc80L65-CMV: High transduction efficiency of both IHCs and OHCs for all cochlear turns. A tonotopic gradient for the transduction of supporting cells, with more supporting cells expressing eGFP at the apex than the base.<br>AAV2/9-CBA: A tonotopic gradient for the transduction of IHCs, with more IHCs expressing eGFP at the base than the apex, while the average transduction efficiency in OHCs was about 15% in all cochlear turns. The transduction efficiencies in supporting cells was similar to AAV2/Anc80L65-CMV.                                                        | Gu et al, 2019        |
| AAV2/8-eGFP                                                              | <i>eGFP</i> | Wild-type mice | PSCC; 5-6 weeks                                 | Canalostomy is an effective and safe approach for drug delivery into the inner ears of adult mice.                                                                                                                                                                                                                                                                                                                                                                                                                                                                                                                                                                        | Guo et al, 2018       |
| AAV2.7m8-CAG-eGFP                                                        | <i>eGFP</i> | Wild-type mice | PSCC; P0-P5, 1-6 months                         | Cochlea: Highly efficient transduction of IHCs, OHCs, and a subset of leucine-rich repeat-containing G-protein coupled receptor 5 (LGR5)-positive supporting cells (inner pillar cells and inner phalangeal cells).<br>Vestibular end-organs: Only data for neonatal animals – less efficient transduction in vestibular organs than cochlea.                                                                                                                                                                                                                                                                                                                             | Isgrig et al, 2019    |

|                                                                        |             |                       |                                  |                                                                                                                                                                                                                                                                                                                                                                                                                                                                                                                                                                                                                                                                                                                                                                                   |                           |
|------------------------------------------------------------------------|-------------|-----------------------|----------------------------------|-----------------------------------------------------------------------------------------------------------------------------------------------------------------------------------------------------------------------------------------------------------------------------------------------------------------------------------------------------------------------------------------------------------------------------------------------------------------------------------------------------------------------------------------------------------------------------------------------------------------------------------------------------------------------------------------------------------------------------------------------------------------------------------|---------------------------|
| Anc80L65-CMV-eGFP<br>AAV9-PHP.B-CMV-eGFP<br>AAV2.7m8-CMV-eGFP-<br>WPRE | <i>eGFP</i> | Wild-type mice        | Utricle; RWM;<br>P1, P7, and P16 | Cochlea: P1 utricle injection of AAV9-PHP.B-Cmv-eGFP: 80-100% of sensory hair cells transduced in all tonotopic regions of the cochlea.<br>Anc80L65 and AAV2.7m8 injections had lower efficiencies and more variable transduction in both IHCs and OHCs in all regions of the cochlea.<br>P7 or P16 utricle injection of AAV9-PHP.B-CMV-eGFP: eGFP expression in 100% of IHCs at both ages. 80 to 100% of OHCs were also GFP-positive at P7, with a lower efficiency at P16.<br>No alteration in auditory function (normal ABR and DPOAE thresholds for any frequency).<br>Vestibular end-organs: Robust transduction of vestibular hair cells at all time points tested for AAV9-PHP.B-CMV-eGFP injected mice.<br>No alteration in vestibular function (normal VsEP thresholds). | Lee et al, 2020           |
| AAV9-PHP.B-CBA-eGFP-<br>WPRE                                           | <i>eGFP</i> | Cynomolgus<br>monkeys | RWM;<br>1.5-5 years              | 100% transduction of both IHCs and OHCs, from base to apex, at the higher doses. It can be considered as a promising AAV for inner gene therapy in humans.                                                                                                                                                                                                                                                                                                                                                                                                                                                                                                                                                                                                                        | Ivanchenko et al,<br>2020 |

BAAV, Bovine AAV; CMV, cytomegalovirus enhancer; RWM, round window membrane; eGFP, *enhanced green fluorescent protein*; PSSC, posterior semicircular canal; IHCs, inner hair cells; OHCs, outer hair cells; CBA, chicken  $\beta$ -actin; WPRE, woodchuck hepatitis virus post-transcriptional regulatory element; CASI, CMV enhancer fused to chicken  $\beta$ -actin promoter, and UBC (Ubiquitin C) enhancer as well as splice donor and acceptor sequences; CAG, CMV enhancer fused to the chicken  $\beta$ -actin promoter; ABR, auditory-evoked brainstem response; DPOAE: Distortion product otoacoustic emissions; VsEP, vestibular evoked potential.
